# Supplementary material for: Photophysical properties of palladium/platinum tetrasulfonyl phthalocyanines and their application in triplet–triplet annihilation upconversion
Source: Royal Society of Chemistry journal article supplement (doi:10.1039/c8tc00513c), 2018-01-01
Supplement: c8tc00513c1.pdf [file c8tc00513c1.pdf]

**Electronic Supplementary Information for:**

Photophysical Properties of Palladium/Platinum  
Tetrasulfonyl Phthalocyanines and Their  
Application in Triplet-Triplet-Annihilation  
Upconversion

*Yuanyuan Che,<sup>a,b,c</sup> Wenbo Yang,<sup>c</sup> Geliang Tang,<sup>c</sup> Fabienne Dumoulin,<sup>d</sup> Jianzhang Zhao,<sup>\* a,b,c</sup>*

*Lang Liu<sup>\* a,b</sup> and Ümit İşci,<sup>\* d</sup>*

<sup>a</sup> School of Chemistry and Chemical Engineering, Xinjiang University, Urumqi 830046, Xinjiang, China.

E-mail: zhaojzh@dlut.edu.cn (JZ); llyhs1973@sina.com (LL); liulang@xju.edu.cn (LL)

<sup>b</sup> Key Laboratory of Energy Materials Chemistry, Ministry of Education, Institute of Applied Chemistry, Xinjiang University, Urumqi 830046, Xinjiang, China.

<sup>c</sup> State Key Laboratory of Fine Chemicals, School of Chemical Engineering, Dalian University of Technology, E-208 West Campus, 2 Ling-Gong Road, Dalian 116024, P. R. China.

E-mail: zhaojzh@dlut.edu.cn

<sup>d</sup> Gebze Technical University, Faculty of Sciences, Department of Chemistry, 41400 Gebze, Kocaeli, Turkey. E-mail: u.isci@gtu.edu.tr

## Contents

|                                                                           |          |
|---------------------------------------------------------------------------|----------|
| 1. Changes in UV/Vis Absorption Spectra at Different Concentrations.....  | Page S3  |
| 2. Nanosecond Transient Absorption Spectroscopy in THF.....               | Page S5  |
| 3. TTA Upconversion of Photosensitizer Upon the Addition of Acceptor..... | Page S6  |
| 4. TTA Upconversion Fluorescence Spectra with different Laser Power.....  | Page S8  |
| 5. Intermolecular Triplet State Energy Transfer.....                      | Page S9  |
| 6. x,y,z Coordinates of the Optimized Geometries.....                     | Page S10 |
| 7. Calculation Details.....                                               | Page S14 |

## 1. Changes in UV/Vis Absorption Spectra at Different Concentrations

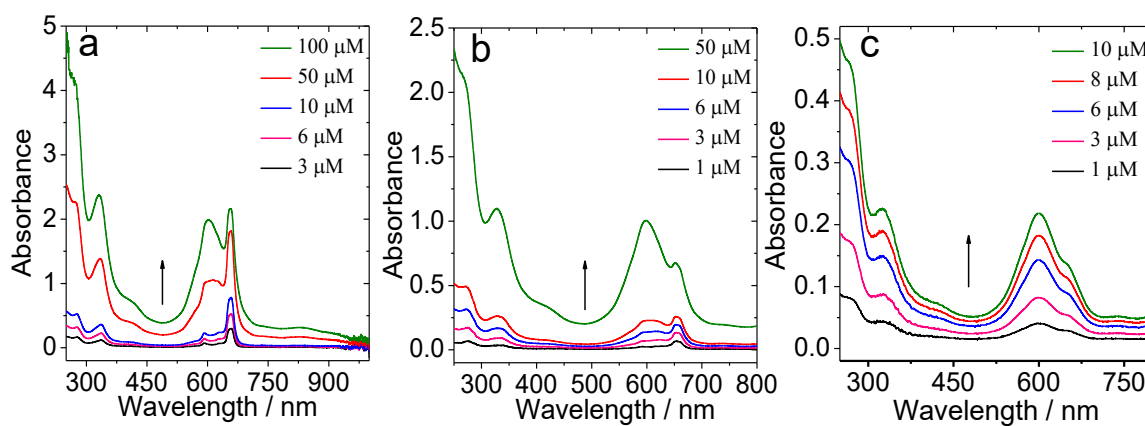

**Fig. S1** UV-vis absorption of **Pd-Pc** (a) in chloroform, (b) in THF and (c) in acetonitrile at 20 °C.

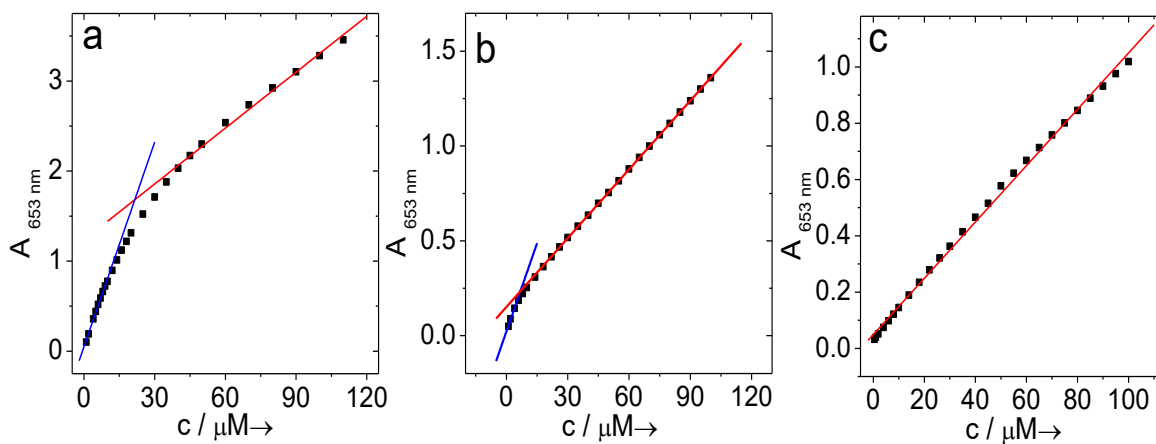

**Fig. S2** Absorbance vs concentration of **Pd-Pc** (a) in chloroform, (b) in THF and (c) in acetonitrile at 653 nm at 20°C.

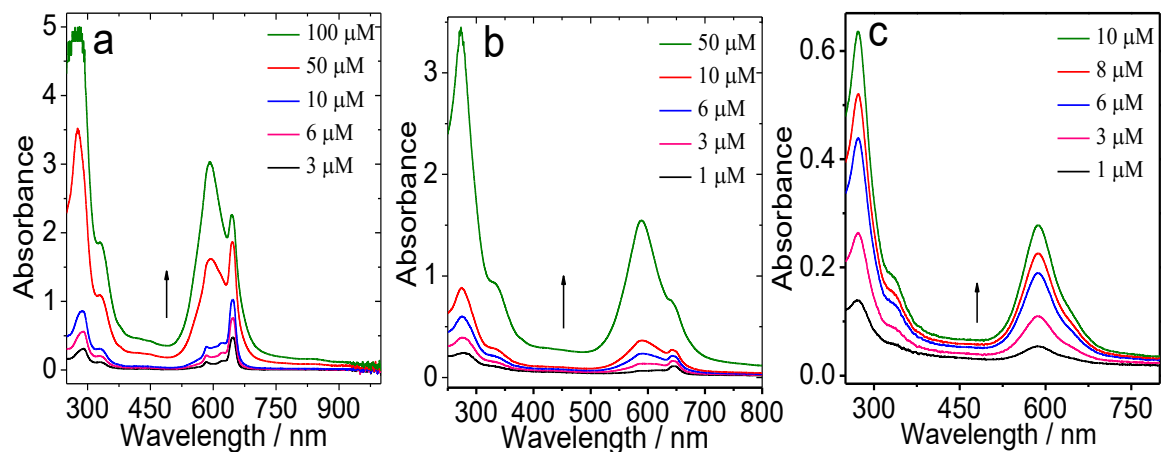

**Fig. S3** UV–vis absorption of **Pt-Pc** (a) in chloroform, (b) in THF and (c) in acetonitrile at 20 °C.

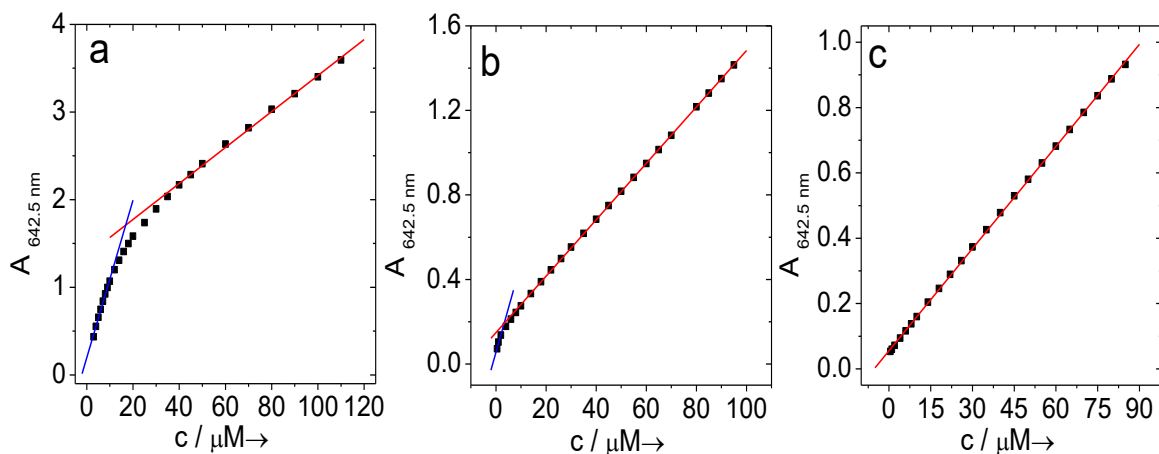

**Fig. S4** Absorbance vs concentration of **Pt-Pc** (a) in chloroform, (b) in THF and (c) in acetonitrile at 642.5 nm, at 20 °C.

## 2. Nanosecond Transient Absorption Spectroscopy in THF

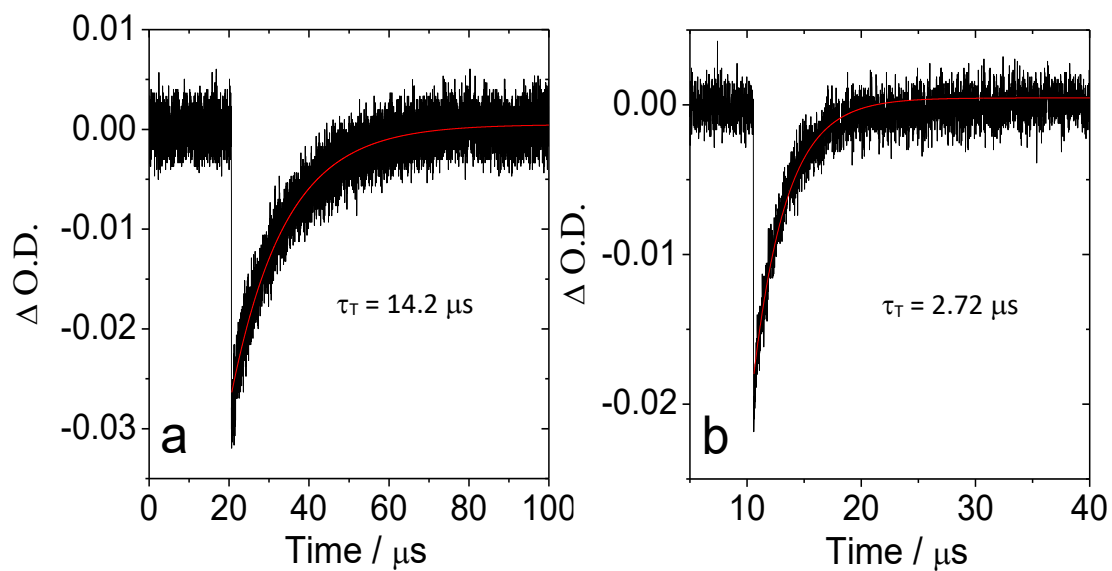

**Fig. S5** (a) Decay trace of **Pd-Pc** at 658 nm. (b) Decay trace of **Pt-Pc** at 647 nm.  $c = 1.0 \times 10^{-5}$  M in deaerated THF at 20 °C.

### 3. TTA Upconversion of Photosensitizers Upon the Addition of Acceptor

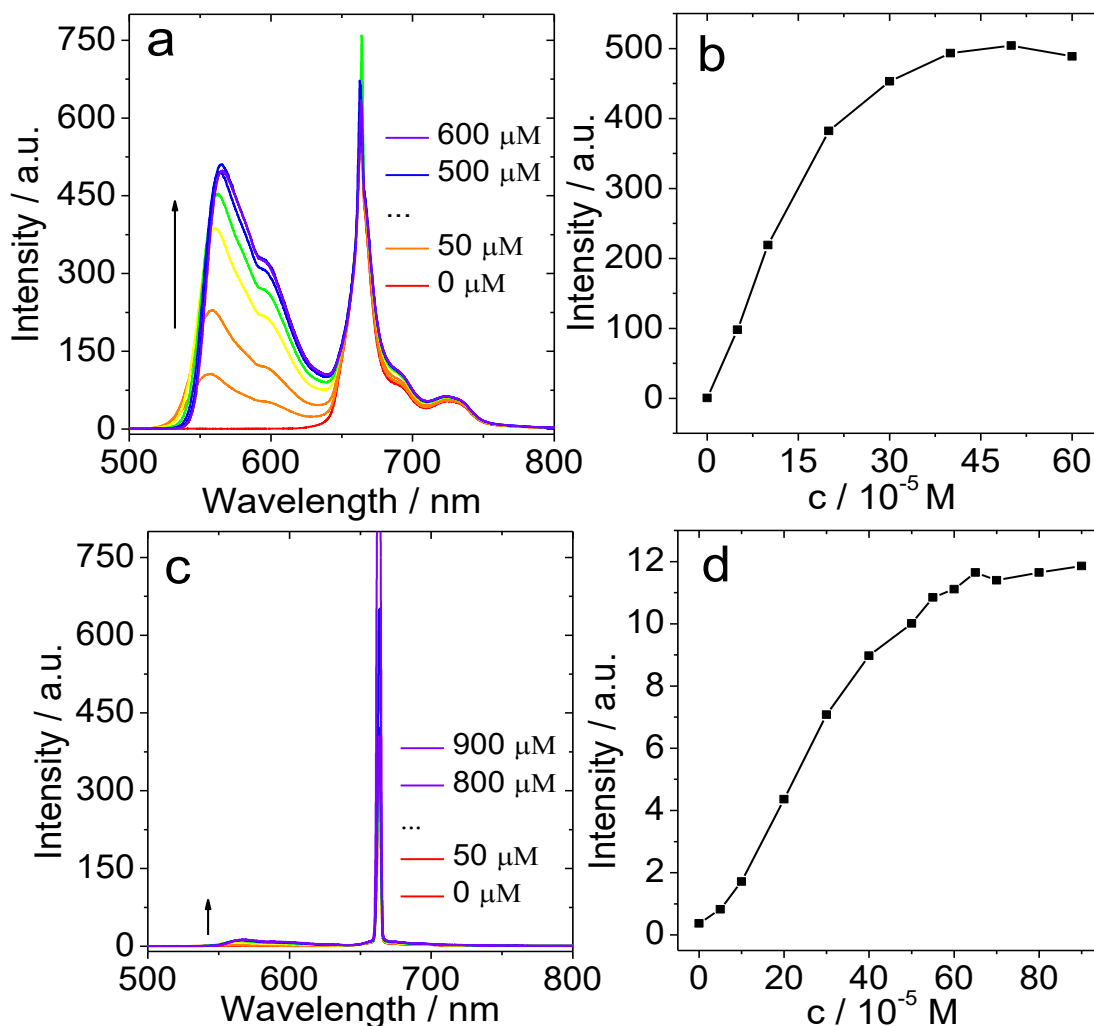

**Fig. S6** The TTA upconversion fluorescence spectral of **Pd-Pc** (a) and **Pt-Pc** (c) as the triplet photosensitizers and **R** as the triplet acceptor. The upconversion intensity of **Pd-Pc** (b) and **Pt-Pc** (d) upon the addition of **R**. Excited with 658 nm cw-laser ( $1115 \text{ mW cm}^{-2}$ ).  $c[\text{sensitizers}] = 1.0 \times 10^{-5} \text{ M}$  in deaerated chloroform at  $20^\circ\text{C}$ .

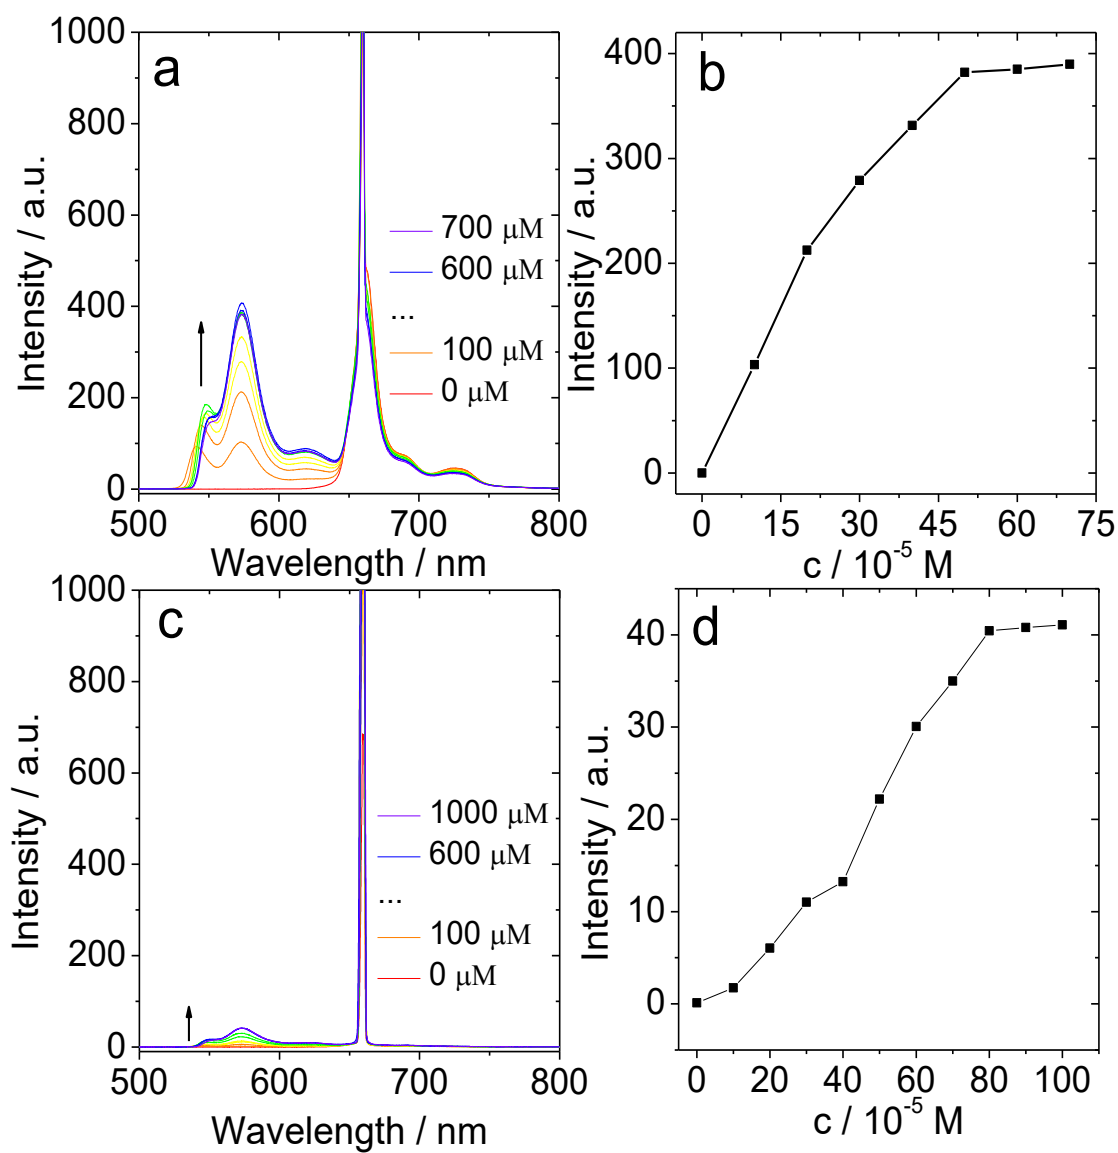

**Fig. S7** The TTA upconversion fluorescence spectral of **Pd-Pc** (a) and **Pt-Pc** (c) as the triplet photosensitizers and PBI as the triplet acceptor, the upconversion intensity of **Pd-Pc** (b) and **Pt-Pc** (d) upon the addition of **PBI**. Excited with 658 nm cw-laser ( $1115 \text{ mW cm}^{-2}$ ).  $c[\text{sensitizers}] = 1.0 \times 10^{-5} \text{ M}$  in deaerated chloroform at  $20 \text{ }^\circ\text{C}$ .

#### 4. Changes of TTA upconversion fluorescence spectral with different laser power

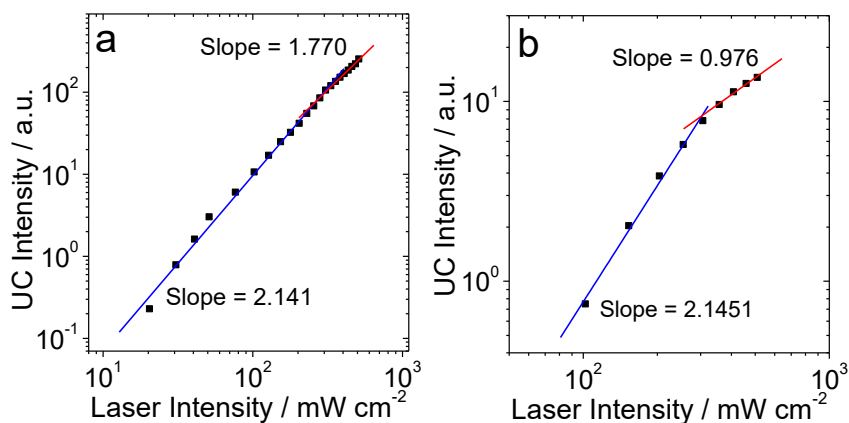

**Fig. S8** Integrated emission intensity plotted as a function of normalized incident light power of **Pd-Pc** (a) and **Pt-Pc** (b) as the triplet photosensitizers and **R** as the triplet acceptor. Excited with a 658 nm cw-laser.  $c[\text{sensitizers}] = 1.0 \times 10^{-5}$  M in deaerated chloroform at 20 °C.

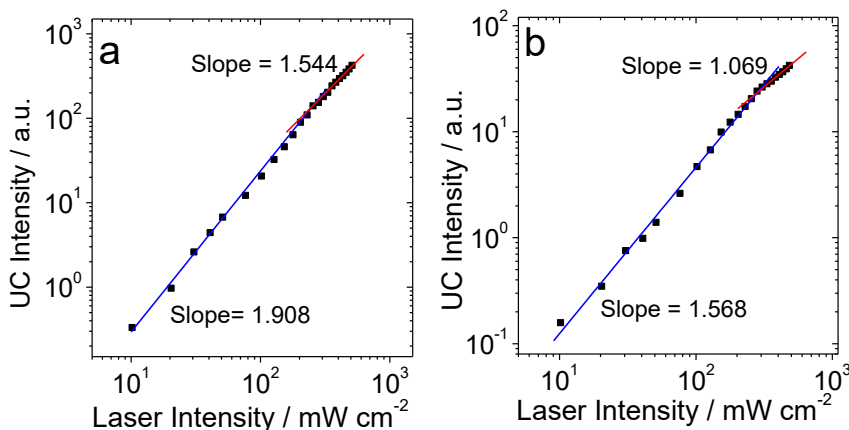

**Fig. S9.** Integrated emission intensity plotted as a function of normalized incident light power of **Pd-Pc** (a) and **Pt-Pc** (b) as the triplet photosensitizers and **PBI** as the triplet acceptor. Excited with a 658 nm cw-laser.  $c[\text{sensitizers}] = 1.0 \times 10^{-5}$  M in deaerated chloroform at 20 °C.



## 5. The Intermolecular Triplet State Energy Transfer

**Table S1.** Kinetics of the Intermolecular Triplet State Energy Transfer between **Pt-Pc** and **1CBPEA**.

| molar ratio | $\tau_{1\ 647\ \text{nm}}^a$<br>( $\mu\text{s}$ ) | $\tau_{2\ 647\ \text{nm}}^b$<br>( $\mu\text{s}$ ) | $k_{\text{ET}}^c$<br>( $\mu\text{s}^{-1}$ ) | $\Phi_{\text{ET}}\%$ <sup>d</sup> |
|-------------|---------------------------------------------------|---------------------------------------------------|---------------------------------------------|-----------------------------------|
| 1:0         | –                                                 | 2.99                                              | –                                           | –                                 |
| 1:9         | 0.136                                             | 2.85                                              | 7.00                                        | 95.2                              |
| 1:15        | 0.130                                             | 2.63                                              | 7.31                                        | 95.1                              |
| 1:21        | 0.132                                             | 2.52                                              | 7.18                                        | 94.8                              |
| 1:27        | 0.169                                             | 2.45                                              | 5.51                                        | 93.1                              |

<sup>a</sup> The lifetime for the shorter of the trace at 658 nm. <sup>b</sup> The lifetime for the longer of the trace at 658 nm. <sup>c</sup> Intermolecular triplet state energy transfer rate constant. <sup>d</sup> Intermolecular triplet state energy transfer efficiency.

## 6. x,y,z coordinates of the optimized geometries

DFT calculation at b3lyp/genecp level.

### Pd-Pc

O 1

|   |             |             |             |
|---|-------------|-------------|-------------|
| C | 2.54837700  | 0.98670900  | 0.01020400  |
| C | 2.56702700  | -1.35899500 | -0.00207200 |
| N | 1.19821800  | 1.21818500  | -0.00472600 |
| N | 1.22160000  | -1.61176600 | -0.01197900 |
| C | 0.94532800  | 2.56509000  | -0.00703900 |
| C | 2.28154000  | -3.64648800 | -0.01834000 |
| C | 0.99010900  | -2.96337800 | -0.02253200 |
| N | -1.63156700 | 1.19566100  | -0.04643400 |
| N | -1.60892400 | -1.63498600 | -0.05323100 |
| C | -1.40037700 | 2.54537000  | -0.03671500 |
| C | -2.97885000 | 0.94260900  | -0.06104400 |
| C | -1.35613500 | -2.98188900 | -0.04984600 |
| C | -2.95899500 | -1.40354500 | -0.06878000 |
| C | -2.69253400 | 3.22668000  | -0.04432000 |
| C | -3.68294400 | 2.22281300  | -0.06014500 |
| C | -2.63585100 | -3.68590900 | -0.06444600 |
| C | -3.64000200 | -2.69554000 | -0.07631800 |
| C | -4.99064200 | -3.03520000 | -0.09715700 |
| H | -5.77134600 | -2.28326200 | -0.12323900 |
| C | -2.95432600 | -5.04437900 | -0.07468100 |
| H | -2.17816200 | -5.80220200 | -0.07495400 |
| C | -5.29365000 | -4.39701400 | -0.09927800 |
| C | -4.30278300 | -5.39633900 | -0.09304900 |
| H | -4.59858600 | -6.43952300 | -0.11843400 |
| C | -5.04111900 | 2.54142800  | -0.07674800 |
| C | -3.03165600 | 4.57740100  | -0.04227000 |
| C | -4.39355100 | 4.88073700  | -0.04985400 |
| C | -5.39278100 | 3.89034000  | -0.07182500 |
| H | -6.43565000 | 4.18698400  | -0.09997000 |
| H | -5.79898200 | 1.76561000  | -0.09872100 |
| H | -2.27924000 | 5.35807800  | -0.04627400 |
| C | 3.89224900  | 4.97961400  | 0.04044200  |
| H | 4.18821400  | 6.02270400  | 0.06619900  |
| C | 4.88290300  | 3.98065500  | 0.04814200  |
| C | 4.57999600  | 2.61849000  | 0.04374100  |

|    |             |             |             |
|----|-------------|-------------|-------------|
| H  | 5.36039300  | 1.86619400  | 0.07011300  |
| C  | 2.54342300  | 4.62767100  | 0.01980600  |
| H  | 1.76720900  | 5.38543600  | 0.01854000  |
| C  | 2.22564400  | 3.26944200  | 0.00862500  |
| C  | 3.22960800  | 2.27928200  | 0.02020600  |
| C  | 3.26939400  | -2.63998600 | -0.00670400 |
| C  | 4.62542500  | -2.95734300 | -0.01313700 |
| H  | 5.39334000  | -2.19187500 | -0.02408500 |
| C  | 4.95062200  | -4.31428300 | -0.02331700 |
| C  | 3.97630600  | -5.32921500 | -0.03776000 |
| H  | 4.29017900  | -6.36690400 | -0.06748300 |
| C  | 2.62190800  | -4.99922400 | -0.03519200 |
| H  | 1.85821000  | -5.76938500 | -0.05329500 |
| N  | -0.17758000 | -3.59031900 | -0.03683400 |
| N  | -3.58668200 | -0.23538600 | -0.07161100 |
| N  | -0.23246000 | 3.17344700  | -0.01983900 |
| N  | 3.17596900  | -0.18073800 | 0.01040700  |
| Pd | -0.20531800 | -0.20837400 | -0.02847800 |
| S  | -7.02413000 | -4.89504700 | -0.12471700 |
| O  | -7.80803300 | -3.78098700 | -0.69116300 |
| O  | -7.10206700 | -6.23277800 | -0.74210000 |
| C  | -7.46537500 | -5.05808600 | 1.61696900  |
| H  | -8.51317300 | -5.36805900 | 1.64411900  |
| H  | -6.83130600 | -5.81799400 | 2.07731500  |
| H  | -7.34050900 | -4.09181100 | 2.10917400  |
| S  | -4.89075000 | 6.61178600  | -0.04128400 |
| S  | 6.61359200  | 4.47880200  | 0.08056900  |
| S  | 6.68946200  | -4.78413900 | -0.03588100 |
| O  | -3.77771100 | 7.40548800  | -0.59605500 |
| O  | -6.23023200 | 6.70248100  | -0.65297400 |
| O  | 6.68634900  | 5.82434500  | 0.68148400  |
| O  | 7.39196800  | 3.37222800  | 0.66877300  |
| O  | 7.45439400  | -3.67247600 | -0.63196000 |
| O  | 6.78921000  | -6.13600600 | -0.61846000 |
| C  | -5.04796000 | 7.01949300  | 1.70909600  |
| H  | -5.35390500 | 8.06769500  | 1.75739200  |
| H  | -5.80930900 | 6.37934800  | 2.15854600  |
| H  | -4.08106600 | 6.88149400  | 2.19660100  |
| C  | 7.06863300  | 4.61856100  | -1.65942700 |
| H  | 6.43908500  | 5.37329000  | -2.13429600 |
| H  | 8.11706200  | 4.92672400  | -1.68239800 |
| H  | 6.94630200  | 3.64614400  | -2.14004100 |
| C  | 7.13329500  | -4.89373800 | 1.70918300  |
| H  | 6.51450700  | -5.65450300 | 2.18850000  |
| H  | 8.18716900  | -5.18147400 | 1.74386000  |
| H  | 6.98881200  | -3.91797200 | 2.17665300  |

**Pt-Pc**

0 1

|   |             |             |             |
|---|-------------|-------------|-------------|
| C | 2.56522600  | 1.00161000  | 0.00387500  |
| C | 2.58480300  | -1.34434700 | -0.01103400 |
| N | 1.21099100  | 1.23114100  | -0.00659100 |
| N | 1.23547000  | -1.59628700 | -0.01560900 |
| C | 0.95867700  | 2.58191900  | -0.00209300 |
| C | 2.29718600  | -3.63169500 | -0.02321000 |
| C | 1.00572200  | -2.95196500 | -0.02262300 |
| N | -1.61674700 | 1.20752100  | -0.02528600 |
| N | -1.59308300 | -1.62066200 | -0.03259400 |
| C | -1.38751900 | 2.56144500  | -0.01978000 |
| C | -2.96778500 | 0.95517900  | -0.03927800 |
| C | -1.34094300 | -2.97139900 | -0.03560500 |
| C | -2.94729900 | -1.39119300 | -0.04611300 |
| C | -2.67997900 | 3.23912400  | -0.02911600 |
| C | -3.66941500 | 2.23481600  | -0.04348900 |
| C | -2.62021700 | -3.67306200 | -0.05035400 |
| C | -3.62476500 | -2.68346200 | -0.05723500 |
| C | -4.97509200 | -3.02402500 | -0.08109100 |
| H | -5.75626000 | -2.27251300 | -0.10436700 |
| C | -2.93802600 | -5.03161100 | -0.06800100 |
| H | -2.16125500 | -5.78879000 | -0.07238100 |
| C | -5.27756600 | -4.38594900 | -0.09178800 |
| C | -4.28613000 | -5.38456200 | -0.08999300 |
| H | -4.58070800 | -6.42789200 | -0.12247100 |
| C | -5.02783300 | 2.55250600  | -0.06818000 |
| C | -3.02044400 | 4.58970400  | -0.03381600 |
| C | -4.38215800 | 4.89218000  | -0.05188700 |
| C | -5.38068200 | 3.90081800  | -0.07500100 |
| H | -6.42420200 | 4.19415700  | -0.11426400 |
| H | -5.78480300 | 1.77583300  | -0.09014300 |
| H | -2.26973600 | 5.37188300  | -0.03677600 |
| C | 3.90429400  | 4.99497500  | 0.05261300  |
| H | 4.19939200  | 6.03812100  | 0.08453200  |
| C | 4.89547100  | 3.99667600  | 0.05441100  |
| C | 4.59303100  | 2.63442500  | 0.04199100  |
| H | 5.37376900  | 1.88236900  | 0.06432200  |
| C | 2.55577500  | 4.64212100  | 0.03083400  |
| H | 1.77900600  | 5.39930100  | 0.03485600  |
| C | 2.23851000  | 3.28382500  | 0.01271200  |
| C | 3.24291000  | 2.29434200  | 0.01745500  |
| C | 3.28463200  | -2.62509500 | -0.01688800 |
| C | 4.64063100  | -2.94238000 | -0.02644700 |

|    |             |             |             |
|----|-------------|-------------|-------------|
| H  | 5.40830600  | -2.17674300 | -0.04065900 |
| C  | 4.96639400  | -4.29922300 | -0.03464100 |
| C  | 3.99237200  | -5.31429900 | -0.04446500 |
| H  | 4.30609500  | -6.35205900 | -0.07290200 |
| C  | 2.63801600  | -4.98433400 | -0.03856400 |
| H  | 1.87431700  | -5.75457300 | -0.05261200 |
| N  | -0.16198600 | -3.57573000 | -0.03016900 |
| N  | -3.57176100 | -0.22323400 | -0.04834100 |
| N  | -0.21961900 | 3.18617200  | -0.00794900 |
| N  | 3.18970500  | -0.16579000 | 0.00001400  |
| S  | -7.00754400 | -4.88454600 | -0.12707300 |
| O  | -7.79099100 | -3.76314000 | -0.67953200 |
| O  | -7.08329600 | -6.21350300 | -0.76343700 |
| C  | -7.45304100 | -5.07264000 | 1.61091700  |
| H  | -8.50061900 | -5.38397100 | 1.63079800  |
| H  | -6.81957400 | -5.83842100 | 2.06225800  |
| H  | -7.33051700 | -4.11334400 | 2.11711400  |
| S  | -4.87969700 | 6.62288800  | -0.06364300 |
| S  | 6.62570900  | 4.49532000  | 0.09263000  |
| S  | 6.70518200  | -4.76844400 | -0.04877800 |
| O  | -3.73165300 | 7.42063800  | -0.53496200 |
| O  | -6.17398100 | 6.71809900  | -0.76560100 |
| O  | 6.69674800  | 5.83709600  | 0.70214700  |
| O  | 7.40357800  | 3.38546800  | 0.67539200  |
| O  | 7.46948000  | -3.65645800 | -0.64510500 |
| O  | 6.80505000  | -6.12018000 | -0.63166900 |
| C  | -5.15830000 | 7.01804700  | 1.67418300  |
| H  | -5.46920100 | 8.06539200  | 1.70815300  |
| H  | -5.94737100 | 6.37385600  | 2.06645000  |
| H  | -4.22687800 | 6.87843500  | 2.22584900  |
| C  | 7.08459500  | 4.64628500  | -1.64538100 |
| H  | 6.45620700  | 5.40409800  | -2.11685100 |
| H  | 8.13310500  | 4.95451000  | -1.66394700 |
| H  | 6.96338300  | 3.67699800  | -2.13254700 |
| C  | 7.15011600  | -4.87833800 | 1.69602700  |
| H  | 6.53158400  | -5.63918200 | 2.17555900  |
| H  | 8.20401000  | -5.16606900 | 1.73012200  |
| H  | 7.00580900  | -3.90265300 | 2.16372200  |
| Pt | -0.19102000 | -0.19475400 | -0.01897200 |

## 7. Calculation details

**Table S2.** Excitation Energies (eV) and corresponding Oscillator Strengths ( $f$ ), main configurations and CI coefficients of the Low-lying Electronically Excited States of complex **Pt-Pc**. Calculated by TDDFT//B3LYP/LANL2DZ, based on the DFT//B3LYP/LANL2DZ Optimized Ground State Geometries.

| TDDFT/B3LYP/LANL2DZ |                                 |                             |                     |                          |                 |           |
|---------------------|---------------------------------|-----------------------------|---------------------|--------------------------|-----------------|-----------|
|                     | Electronic transition           | Energy [eV/nm] <sup>a</sup> | $f^b$               | Composition <sup>c</sup> | CI <sup>d</sup> | Character |
| Singlet             | S <sub>0</sub> →S <sub>1</sub>  | 2.08 / 596                  | 0.6825              | H→L                      | 0.6984          | LMCT      |
|                     | S <sub>0</sub> →S <sub>2</sub>  | 2.11 / 588                  | 0.7146              | H→L+1                    | 0.6981          | LMCT      |
|                     | S <sub>0</sub> →S <sub>16</sub> | 3.76 / 329                  | 0.4506              | H-5→L+1                  | 0.4474          | LMCT      |
| Triplet             | S <sub>0</sub> →T <sub>1</sub>  | 1.33 / 930                  | 0.0000 <sup>e</sup> | H→L                      | 0.7063          | LMCT      |
|                     | S <sub>0</sub> →T <sub>2</sub>  | 1.35 / 916                  | 0.0000 <sup>e</sup> | H→L+1                    | 0.7058          | LMCT      |
|                     | S <sub>0</sub> →T <sub>3</sub>  | 2.38 / 520                  | 0.0000 <sup>e</sup> | H-2→L                    | 0.5084          | ILCT      |
|                     | S <sub>0</sub> →T <sub>4</sub>  | 2.46 / 504                  | 0.0000 <sup>e</sup> | H-1→L+1                  | 0.5210          | ILCT      |
|                     | S <sub>0</sub> →T <sub>5</sub>  | 2.49 / 499                  | 0.0000 <sup>e</sup> | H-1→L                    | 0.6250          | ILCT      |

<sup>a</sup> Only the selected low-lying excited states are presented. <sup>b</sup> Oscillator strengths. <sup>c</sup> Only the main configurations are presented. <sup>d</sup> The CI coefficients are in absolute values. <sup>e</sup> No spin-orbital coupling effect was considered, thus the  $f$  values are zero.

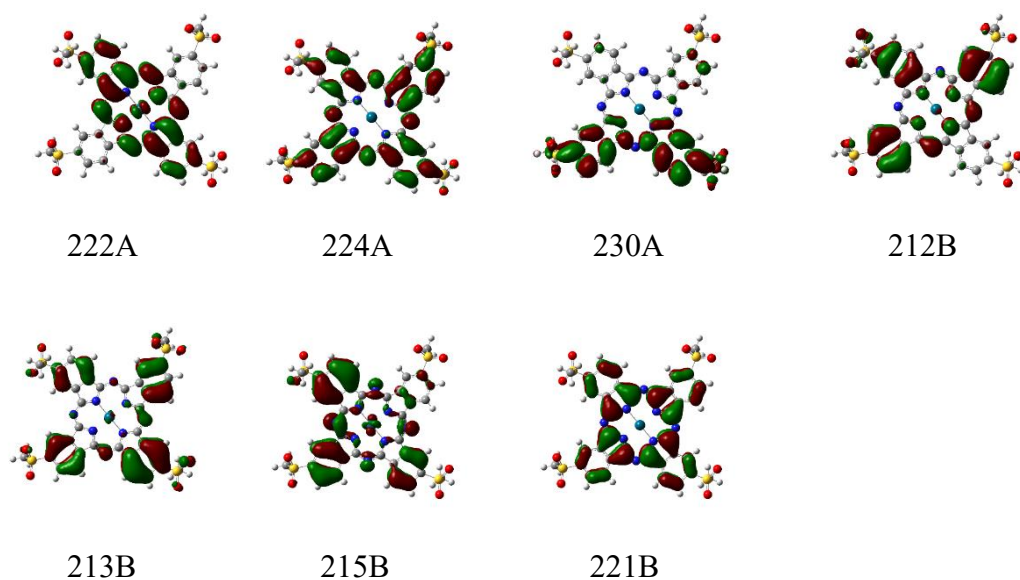

**Fig. S10.** Selected frontier molecular orbitals of the triplet state of **Pd-Pc** (in chloroform).

**Table S3.** Electronic Excitation Energies (eV) and corresponding Oscillator Strengths ( $f$ ), main configurations and CI coefficients of the Low-lying Electronically Triplet Excited States of **Pd-Pc** calculated by TDDFT//B3LYP/6-31G(d), based on the DFT//B3LYP/6-31G(d) Optimized  $T_1$  Excited State Geometries

| TDDFT/B3LYP/LANL2DZ |                          |                             |        |                         |                 |
|---------------------|--------------------------|-----------------------------|--------|-------------------------|-----------------|
|                     | Electronic transition    | Energy [eV/nm] <sup>a</sup> | $f^b$  | Composition             | CI <sup>c</sup> |
| Triplet             | $T_1 \rightarrow T_4$    | 1.80 / 690                  | 0.2678 | 222A $\rightarrow$ 224A | 0.8997          |
|                     | $T_1 \rightarrow T_{12}$ | 2.28 / 543                  | 0.1548 | 215B $\rightarrow$ 221B | 0.7019          |
|                     | $T_1 \rightarrow T_{15}$ | 2.35 / 528                  | 0.1505 | 213B $\rightarrow$ 221B | 0.6376          |
|                     | $T_1 \rightarrow T_{17}$ | 2.48 / 499                  | 0.5746 | 212B $\rightarrow$ 221B | 0.7051          |
|                     | $T_1 \rightarrow T_{45}$ | 3.38 / 367                  | 0.1400 | 222A $\rightarrow$ 230A | 0.7244          |

<sup>a</sup> Only the selected low-lying excited states are presented. <sup>b</sup> Oscillator strength. No spin-orbital coupling effect was considered in the calculation thus the oscillators are zero. <sup>c</sup> The CI coefficients are in absolute values.

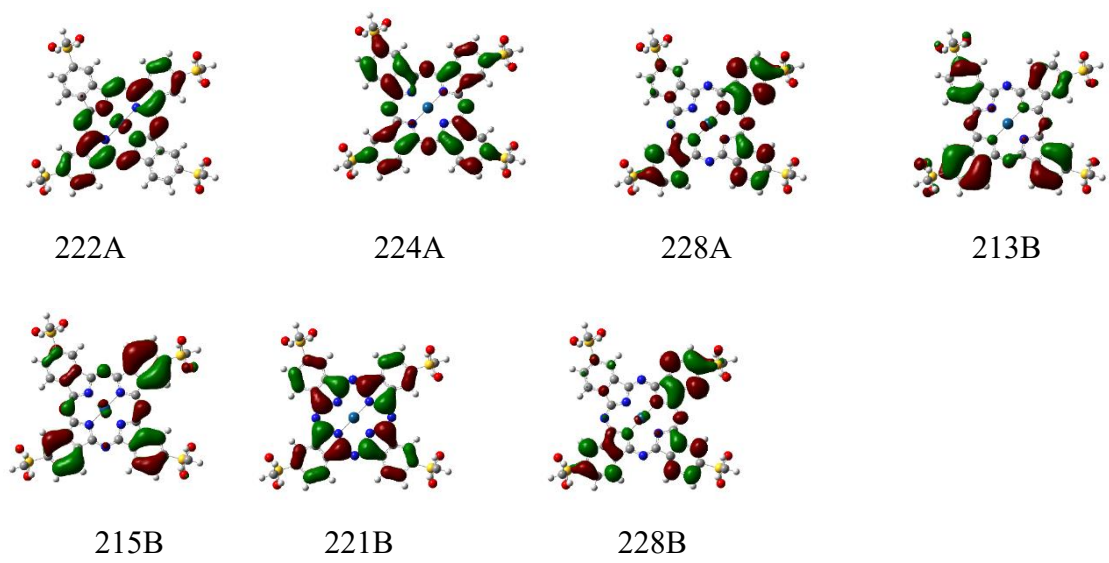

**Figure S15.** Selected frontier molecular orbitals of the triplet state of **Pd-Pc** (in chloroform).



**Table S4.** Electronic Excitation Energies (eV) and corresponding Oscillator Strengths (f), main configurations and CI coefficients of the Low-lying Electronically Triplet Excited States of **Pt–Pc** calculated by TDDFT//B3LYP/6-31G(d), based on the DFT//B3LYP/6-31G(d) Optimized T<sub>1</sub> Excited State Geometries

| TDDFT/B3LYP/LANL2DZ |                                 |                             |                       |             |                 |
|---------------------|---------------------------------|-----------------------------|-----------------------|-------------|-----------------|
|                     | Electronic transition           | Energy [eV/nm] <sup>a</sup> | <i>f</i> <sup>b</sup> | Composition | CI <sup>c</sup> |
| Triplet             | T <sub>1</sub> →T <sub>5</sub>  | 1.72 / 723                  | 0.2327                | 222A→224A   | 0.9426          |
|                     | T <sub>1</sub> →T <sub>11</sub> | 2.25 / 551                  | 0.1871                | 215B→221B   | 0.3532          |
|                     | T <sub>1</sub> →T <sub>14</sub> | 2.31 / 537                  | 0.1815                | 213B→221B   | 0.5938          |
|                     | T <sub>1</sub> →T <sub>16</sub> | 2.45 / 505                  | 0.3196                | 222A→228B   | 0.5202          |
|                     | T <sub>1</sub> →T <sub>17</sub> | 2.46 / 504                  | 0.3293                | 222A→228A   | 0.5311          |

<sup>a</sup> Only the selected low-lying excited states are presented. <sup>b</sup> Oscillator strength. No spin-orbital coupling effect was considered in the calculation thus the oscillators are zero. <sup>c</sup> The CI coefficients are in absolute values.
